# Supplementary material for: Bioactive compounds from Huashi Baidu decoction possess both antiviral and anti-inflammatory effects against COVID-19
Source: PubMed Central journal article supplement — Proc Natl Acad Sci U S A. 2023 Apr 24;120(18):e2301775120. doi: 10.1073/pnas.2301775120 (PMC10160982; doi:10.1073/pnas.2301775120), 2023-04-24
Supplement: pnas.2301775120.sapp.pdf [file pnas.2301775120.sapp.pdf]

1 SI Appendix for "Bioactive compounds from Huashi Baidu decoction possess both  
2 antiviral and anti-inflammatory effects against COVID-19"

3

4 Supplement 1: Mouse experiments

5 Supplement 2: Chemical identification of Huashi Baidu decoction (Q-14)

6 Supplement 3: *In vivo* identification of Huashi Baidu decoction (Q-14) compounds

7 Supplement 4: Protein expression and purification

8 Supplement 5: Cell viability assay

9 Supplement 6: *In vitro* polymerase activity assay

10 Supplement 7: High-throughput activity assay

11 Supplement 8: PDE4 inhibition assay

12

13

14 Dataset S1: Detailed information on chemical compounds contained in Huashi Baidu  
15 decoction (Q-14) using HPLC-Q-TOF-MS/MS system

16 Dataset S2: The compounds in plasma after Huashi Baidu decoction (Q-14) treatment  
17 using HPLC-Q-TOF-MS/MS system

18 Dataset S3: Inhibition of PDE4 by 30 compounds included in Huashi Baidu decoction  
19 (Q-14)

20 Dataset S4: Crystallography data collection and refinement statistics

21 Dataset S5: Composition of Huashi Baidu decoction (Q-14)

22 Dataset S6: Detailed information on the reference standards for chemical identification

23 Dataset S7: Detailed information on the reference standards for antiviral and anti-  
24 inflammatory activities screening

25

26

1 **Supplement 1: Mouse experiments**

2 Transgenic mice were generated by microinjection of the mouse *Ace2* promoter driving  
3 the human *ACE2* (*hACE2*) coding sequence into the pronuclei of fertilized ova from  
4 wild-type mice, and then *hACE2* integration was identified by PCR as previously  
5 described(1). Five days post infection, mice were sacrificed, and lung tissues were  
6 collected for follow-up viral load determination (by quantitative real-time PCR, RT-  
7 qPCR), cytokine assays, and pathological examination

8 **1) RT-qPCR**

9 Total RNA was isolated and reverse transcribed using an RNeasy Kit (Qiagen) and  
10 QuantiTect Reverse Transcription Kit (Qiagen). We adopted the following qRT-PCR  
11 protocol: 50°C, 2 min; 95°C, 2 min; 95°C, 15 s; and 60°C, 30 s (40 cycles); and melt  
12 curve stage: 95°C, 15 s; 60°C, 1 min; and 95°C, 45 s. The SARS-CoV-2 primers 5'-  
13 TCGTTTCGGAAGAGACAGGT-3' (forward) and 5'-GCGCAGTAAGGATGGCTAGT-3'  
14 (reverse) were used.

15 **2) Chemokine and cytokine detection**

16 Chemokines and cytokines were measured using a LEGENDplex Mouse Th Cytokine  
17 Panel (13-plex) array. Briefly, 25 µL of lung tissue homogenate was incubated with  
18 microspheres. After the removal of unbound detection antibodies, Biotinylated Anti-  
19 Mouse Antibodies were added. The final detection complex was formed with the  
20 addition of streptavidin-phycoerythrin (SA-PE) conjugate. The fluorescence intensity of  
21 PE on each microsphere was analyzed for quantitative analysis of soluble protein. Data  
22 were analyzed using the LEGENDplex™ Data Analysis Software.

23 **Supplement 2: Chemical identification of Huashi Baidu decoction (Q-14)**

24 **1) Solution preparation**

25 Reference standards were diluted with methanol (MeOH) to obtain a series of control  
26 solutions (1 mg/mL). To prepare Q-14 solution, 100 mg Q-14 was precisely weighed  
27 and extracted with 5 mL 50% MeOH (v/v) under ultra-sonication (40 kHz) for 30 min,  
28 followed by centrifugation at 8000 rpm for 5 min. After extraction, the filtrate was

1 collected through a 0.22- $\mu$ m filter, and 1.0  $\mu$ L was injected for ultra-high performance  
2 liquid chromatography coupled to quadrupole time-of-flight mass spectrometry (UPLC-  
3 Q-TOF-MS/MS) for analysis.

#### 4 **2) HPLC-Q-TOF-MS/MS conditions**

5 Analysis was conducted on an ACQUITY UPLC-I-Class interfaced with a Synapt-XS  
6 Q-TOF-MS (Waters, MA, USA) with an electrospray ionization source (ESI). An  
7 ACQUITY UPLC HSS T3 column (2.1 $\times$ 100 mm, 1.8  $\mu$ m) was used to perform  
8 chromatographic separation with a flow rate of 0.5 mL/min at 40°C. A linear gradient  
9 program with a mobile phase system including solvent A (deionized water with 0.1%  
10 formic acid, v/v) and solvent B (acetonitrile with 0.1% formic acid, v/v) is described in  
11 detail: 0-0.2 min, 5% B; 0.2-2.0 min, 5.0-8.0% B; 2.0-9.0 min, 8.0-13.0% B; 9.0-16.0  
12 min, 13.0-20.0% B; 16.0-16.5 min, 20.0-21.0% B; 16.5-22.0 min, 21.0-30.0% B; 22.0-  
13 23.0 min, 30-35% B; 23.0-28.0 min, 35-42% B; 28.0-33.0 min, 42.0-60.0% B; 33.0-  
14 35.0 min, 60.0-98.0% B; 35.0-38.0 min, 98% B; 38.0-38.5 min, 98.0-5.0% B; and 38.5-  
15 41.0 min, 5% B.

16 The instrumental settings of the Q-TOF-MS/MS are described as follows: capillary  
17 voltage, 2.5 kV(-)/0.5 kV(+); cone voltage, 40 V; source temperature, 100°C;  
18 desolvation temperature, 450°C. The solvents were removed by evaporation under  
19 nitrogen with a flow rate of 900 L/h. Samples were analyzed in both positive and  
20 negative ionization modes with scanning mass-to-charge (*m/z*) ranging from 50 to  
21 1500 Da. Argon was used as the collision gas; the low energy was 6 eV; the high  
22 energy was 50-70 eV. Leucine enkephalin was used as the reference lock mass. Mass  
23 chromatograms and mass spectra were acquired using MassLynx version 4.2 (Waters,  
24 MA, USA).

### 25 **Supplement 3: Compounds of Huashi Baidu decoction (Q-14) *in vivo*** 26 **identification**

#### 27 **1) Animal**

28 Specific-pathogen-free (SPF) male SD rats (n=8, 6- to 8-weeks-old, 250 $\pm$ 20 g in weight)

1 were purchased from Beijing Vital River Laboratory Animal Technology Co., Ltd.  
2 (Production license no.: SCCK 2021-0006, Beijing, China; n=4 per group, including a  
3 normal control group and normal control+Q-14 treatment group). Their diet was  
4 prohibited for 12 h before the experiment but water was provided *ad libitum*. In the Q-  
5 14 treatment group, the dosage selection for Q-14 was 6.165 g/kg, nearly equivalent  
6 to five times the daily dosage of COVID-19 patients in clinics. The normal control group  
7 received an equal volume of saline.

## 8 **2) Collection of blood samples**

9 Blood samples (~0.25 mL) were collected from the retinal venous plexus into  
10 heparinized 1.5-mL EDTA-K2 anticoagulant tubes before administration and 0, 0.5, 1,  
11 2, 4, 6, 8, 12, 14, 16, 18, 24, 36, and 48 h after administration of Q-14. The plasma  
12 samples were obtained after centrifuging at 12000 rpm for 15 min and stored at -20°C  
13 prior to analysis. All samples were mixed using the AUC pooling method, and then the  
14 proteins were precipitated with 0.1% formic acid-MeOH (v/v). After vortexing, samples  
15 were centrifuged at 12000 rpm for 10 min at 4°C. The extract was blow-dried under  
16 nitrogen and redissolved with 100 µL 50% MeOH (v/v) under ultra-sonication (40 kHz)  
17 for 30 min, followed by centrifugation at 12000 rpm for 10 min. Samples (1.0 µL) were  
18 injected into the UPLC-Q-TOF-MS/MS system for analysis.

## 19 **3) HPLC-Q-TOF-MS/MS conditions**

20 The HPLC-Q-TOF-MS/MS settings were as above.

## 21 **Supplement 4: Protein expression and purification**

### 22 **1) Protein expression and purification of SARS-CoV-2 M<sup>PRO</sup>**

23 As in our previous study(2), a cDNA sequence encoding residues 3264-3569 of  
24 ORF1ab (GenBank: MN908947.3) was cloned into the *NcoI* and *NotI* sites of the pET-  
25 28b vector (Genscript) in-frame with an N-terminal His and SUMO tag. The vector was  
26 transformed into *E. coli* strain BL21 (DE3). Isopropyl-β-d-thiogalactopyranoside (IPTG;  
27 0.2 mM) was added to the LB medium at an OD<sub>600</sub> of 0.6-0.8. The cells were cultured  
28 at 16°C for 18 h and subsequently lysed by sonication and centrifuged for 30 min. Then,

1 the supernatants containing soluble protein were purified using 5-mL HisTrap HP  
2 columns (GE Healthcare, IL, USA). The purified proteins were incubated with 2  $\mu$ L/mg  
3 SUMO protease (Beyotime, P2312M) at 30°C for 2 h after centrifugation and then  
4 purified by HisTrap HP chromatography (GE Healthcare, IL, USA) again. The native  
5 SARS-CoV-2 M<sup>pro</sup> protein was obtained using a Hiload 16/600 Superdex 75 PG column  
6 (GE Healthcare, IL, USA) with a buffer of 10 mM Tris-HCl, 1 mM DTT, and 1 mM EDTA,  
7 pH 7.5.

## 8 **2) PDE4D expression and purification**

9 Briefly, the cDNA encoding the catalytic domain of human PDE4D (GenBank:  
10 NM\_001197221.1; coding region: T86-S413) with a His-tag was cloned into the  
11 pET15b vector. The plasmid was then transformed into *E.coli* BL21(DE3) cells for  
12 protein expression. The expressed protein was purified by Ni NTA (GE Healthcare,  
13 Uppsala, Sweden), Q-Sepharose, and superdex200 (GE Healthcare, Uppsala,  
14 Sweden) chromatography until the purity was > 95%. The eluted protein samples were  
15 stored in a solution of 20 mM HEPES, pH 7.0, and 50 mM NaCl for the enzymatic  
16 inhibition assays and protein crystallization.

## 17 **Supplement 5: Cell viability assay**

18 First, Caco-2-N cells were seeded in 96-well plates at a density of  $1 \times 10^4$  cells/well (in  
19 DEME + 10% FBS) and incubated under 5% CO<sub>2</sub> at 37°C for 12 h. Then, cells were  
20 exposed to different dosages of drugs diluted in a DMEM culture medium for 48 h. After  
21 that, the contents of the wells were substituted with fresh medium containing 10% Cell  
22 Counting Kit-8 (CCK-8) solution and incubated at 37°C for 2 h. The final optical density  
23 at OD<sub>450</sub> was determined using a microplate reader (Bio-Rad, CA, USA).

## 24 **Supplement 6: *In vitro* polymerase activity assay**

25 To perform the primer extension assay, template RNA and primer RNA were preheated  
26 at 65°C for 5 min to form annealed complementary RNA strands. Then, the mixture  
27 consisting of buffer, protein sample, annealed RNA, and drugs at different dosages  
28 was added to the reaction system and incubated for 15 min at room temperature, and

1 0.5 mM NTP in a reaction buffer containing 10 mM Tris-HCl (pH 8.0), 10 mM KCl, 1  
2 mM beta-mercaptoethanol, and 2 mM MgCl<sub>2</sub> (freshly added prior usage) was added.  
3 The condition of the extension reaction were 30°C for 30 min. After the reaction, RNA  
4 loading buffer was added and boiled for 10 min. The samples were separated using  
5 20% PAGE gels. Images were taken using a Vilber Fusion system and quantified with  
6 ImageJ software.

### 7 **Supplement 7: High-throughput activity assay**

8 To explore the antiviral therapy targets, a fluorescence resonance energy transfer  
9 (FRET) assay was adopted. An LC00-custom Compound Library contained Q-14  
10 ingredients was purchased from Shanghai TOPSCIENCE (Shanghai, China). The  
11 initial specification was all 10 mM (dissolved in DMSO solution), taking 2 μL of 10 mM  
12 solution into 98 μL buffer (50 mM Tris-HCl, pH 7.3, and 1 mM EDTA) to prepare  
13 compound working solutions. SARS-CoV-2 M<sup>pro</sup> (final concentration of 150 nM) and 40  
14 μL diluted compound working solution were added to black 96-well plates, then  
15 incubated at room temperature for 10 min. Fluorescence values were determined using  
16 the CLARIOstar Plus multifunctional microplate detection system (BMG Labtech,  
17 Offenburg, Germany) after adding 100 μM MCA-AVLQSGFR-Lys(Dnp)-Lys-NH<sub>2</sub>  
18 substrate (GenScript, Nanjing) with a volume of 20 μL. All excitation wavelengths were  
19 set at 320 nm, the emission wavelengths were 405 nm, and the fluorescence values  
20 were measured every 90 s for a total of 20 cycles. The fluorescence values in the first  
21 six cycles were collected and used to calculate the initial reaction rate  $v_0$  values, using  
22 the following formula to calculate the inhibition rate:

$$23 \quad Inhibition \% = \left[ 1 - \frac{v_0 (compound - Mpro - substrate)}{v_0 (Mpro - substrate)} \right] * 100\%$$

24 To determine the concentration scope of the inhibitory effects, multiple compound  
25 concentrations, almost ranging from mM to nM, were prepared, measured as  
26 described previously in triplicate, and the IC<sub>50</sub> values were calculated as the mean via  
27 nonlinear regression analysis on GraphPad Prism software 8.0.1, plotting the inhibition

1 rate curves as well.

## 2 **Supplement 8: PDE4 inhibition assay**

3 A protein solution with a concentration of 0.2-0.4 nM was prepared using assay buffer  
4 (50 mM Tris, pH 7.5, 8.3 mM MgCl<sub>2</sub>, and 1.7 mM EGTA). Assays were performed in  
5 96-well plates with a total volume of 125 μL/well. Compounds were dissolved in DMSO  
6 [1% (v/v) in the final concentration] and added to plates in a volume of 10 μL, followed  
7 by the addition of 80 μL of protein solution and 10 μL of [<sup>3</sup>H]-cAMP (0.5μCi/mL). The  
8 reaction was stopped by the addition of 25 μL of phosphodiesterase SPA beads  
9 (RPNQ0150, PerkinElmer Inc., MA, USA) after incubation at 30°C for 10 min. Twenty  
10 minutes later, luminescence was measured with a MicroBeta2 (PerkinElmer Inc., MA,  
11 USA). Apremilast (Shanghai yuanye Bio-Technology Co., Ltd, Shanghai, China,  
12 purity≥99%) was used as a positive control. Three independent experiments were  
13 conducted to determine the 50% inhibitory concentration (IC<sub>50</sub>) values of each  
14 compound. All experimental data were analyzed using GraphPad Prism, version 8.0  
15 (GraphPad Inc., San Diego, CA, USA).

16

17





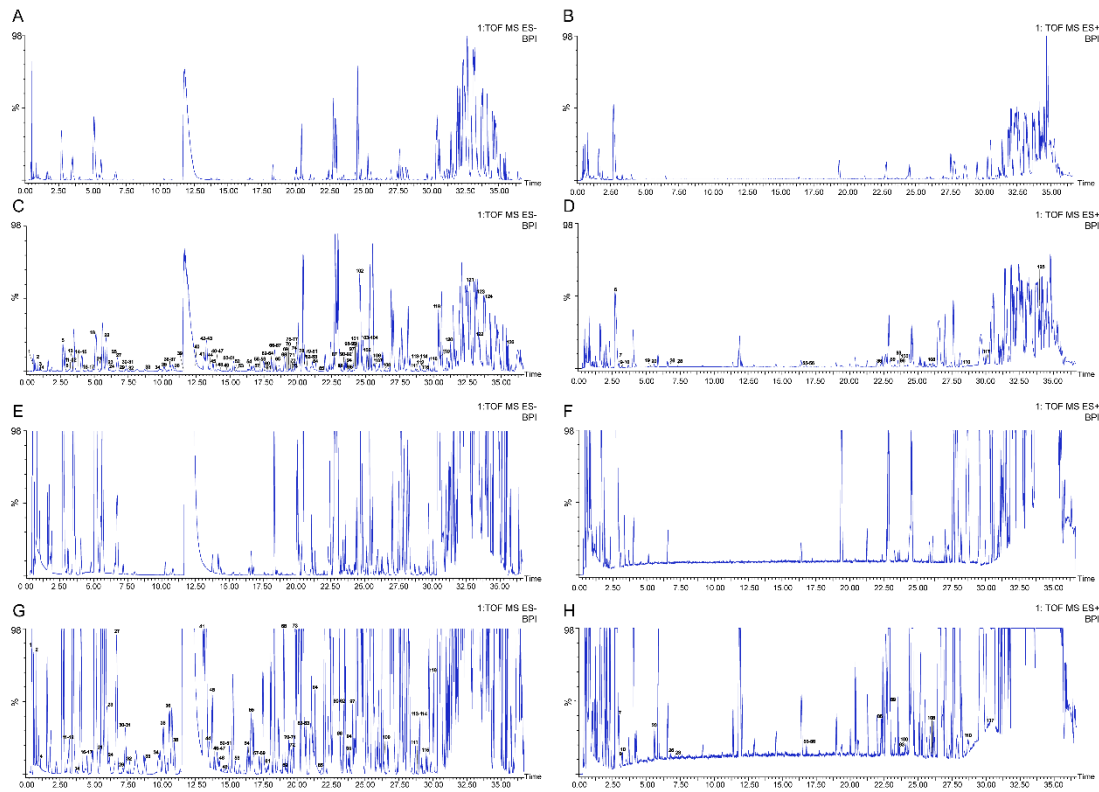

1

2 **Fig. S2** The compounds in plasma after Huashi Baidu decoction (Q-14) treatment  
 3 using the ultra-high performance liquid chromatography with a quadrupole time-  
 4 of-flight mass spectrometry (UPLC-Q-TOF/MS) system. (A-B, E-F) The chemical  
 5 base peak ion (BPI) chromatogram in plasma after the treatment of Q-14 in the  
 6 negative and positive ion modes (signals were amplified by 1 or 10, respectively). (C-  
 7 **D, G-H**) The BPI chromatogram of blank plasma in the negative and positive ion modes  
 8 (signals were amplified by 1 or 10, respectively).

9

10

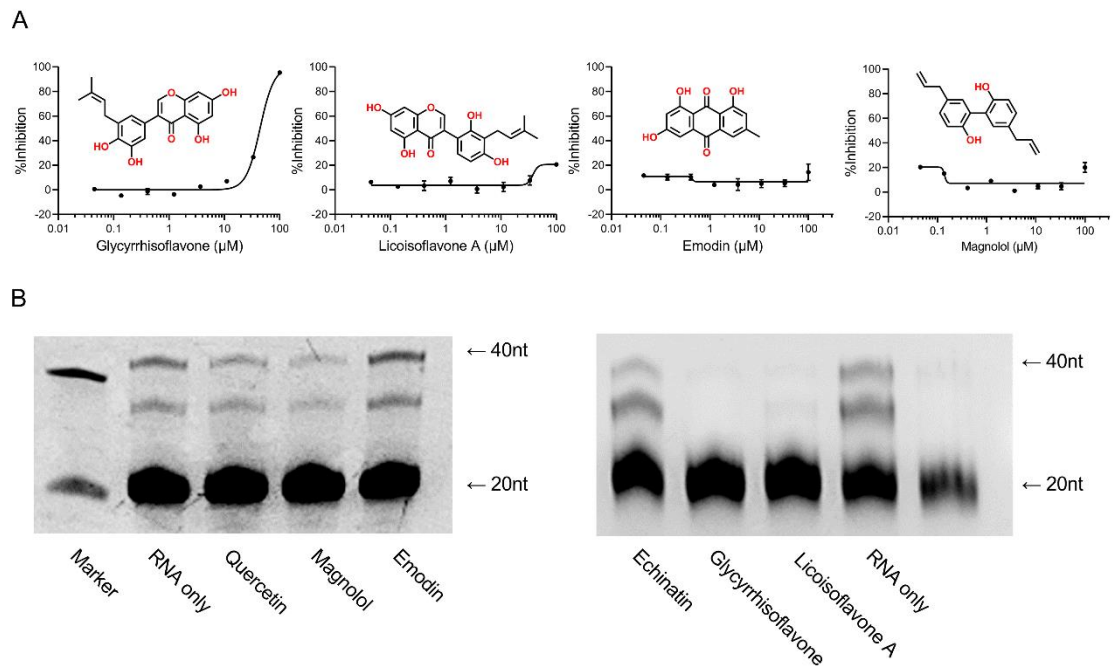

1

2 **Fig. S3 Screening for anti-SARS-CoV-2 bioactive compounds with prototype**

3 **structures from Q-14. (A) The IC<sub>50</sub> values of glycyrrhisoflavone, licoisoflavone A,**

4 **emodin, and magnolol on SARS-CoV-2 M<sup>pro</sup>. (B) The inhibitory activities of quercetin,**

5 **magnolol, emodin, echinatin, glycyrrhisoflavone, and licoisoflavone A on RdRp. Data**

6 **are expressed as the mean ± SEM. Experiments were repeated in triplicate,**

7 **independently.**

8

1

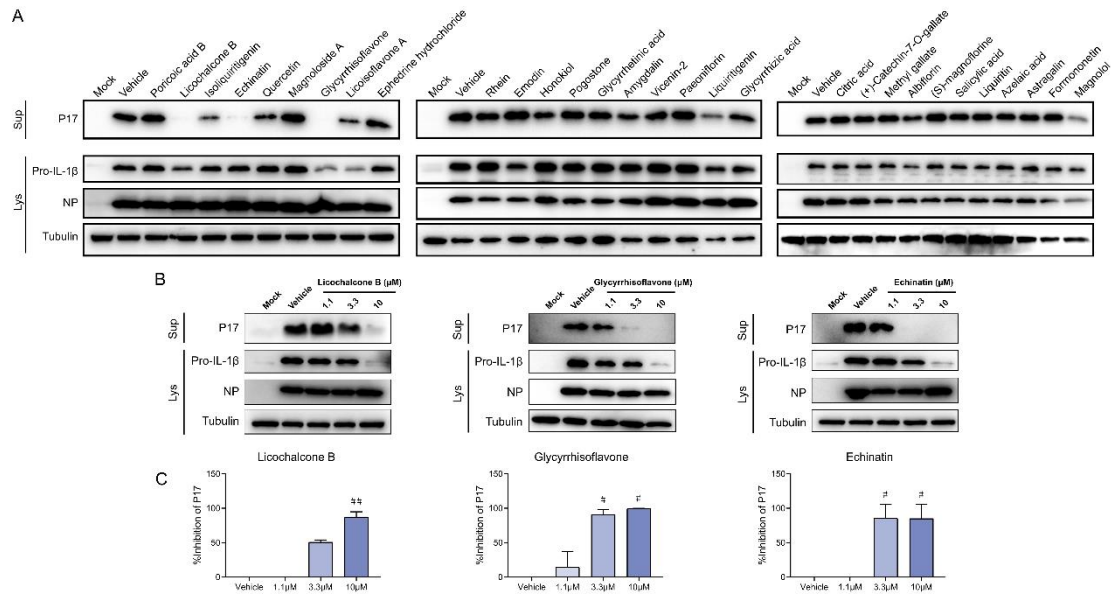

2

3 **Fig. S4 Screening of anti-inflammatory compounds from Q-14.** (A) Preliminary  
 4 screening of the anti-inflammatory activity of 30 compounds from Q-14. THP-1  
 5 macrophages were incubated with SFTSV (MOI = 5) for 1 h and treated with the 30  
 6 compounds in Q-14 at a concentration of 10  $\mu$ M. Cells and supernatants were  
 7 harvested at 48 h post infection. P17 levels in supernatants and the expression levels  
 8 of Pro-IL-1 $\beta$  or NP in cell lysates were determined by western blotting. (B-C) The dose-  
 9 dependent effects of licochalcone B, glycyrrhisoflavone, and echinatin on the secretion  
 10 of P17 induced by SFTSV infection. THP-1 macrophages were incubated with SFTSV  
 11 (MOI = 5) for 1 h and treated with licochalcone B, glycyrrhisoflavone, and echinatin  
 12 concentrations of 1.1, 3.3, or 10  $\mu$ M. Cells and supernatants were collected at 48 h  
 13 post infection. P17 levels in supernatants and expression levels of Pro-IL-1 $\beta$  or NP in  
 14 cell lysates were determined by western blotting (B). The inhibition rates were  
 15 evaluated by analysis of gray values of the P17 bands (C). Data are representative of  
 16 two independent experiments. Error bars represent mean  $\pm$  SEM. Statistical  
 17 significance was analyzed by one-way ANOVA. # $P$  < 0.05; ## $P$  < 0.01.

18

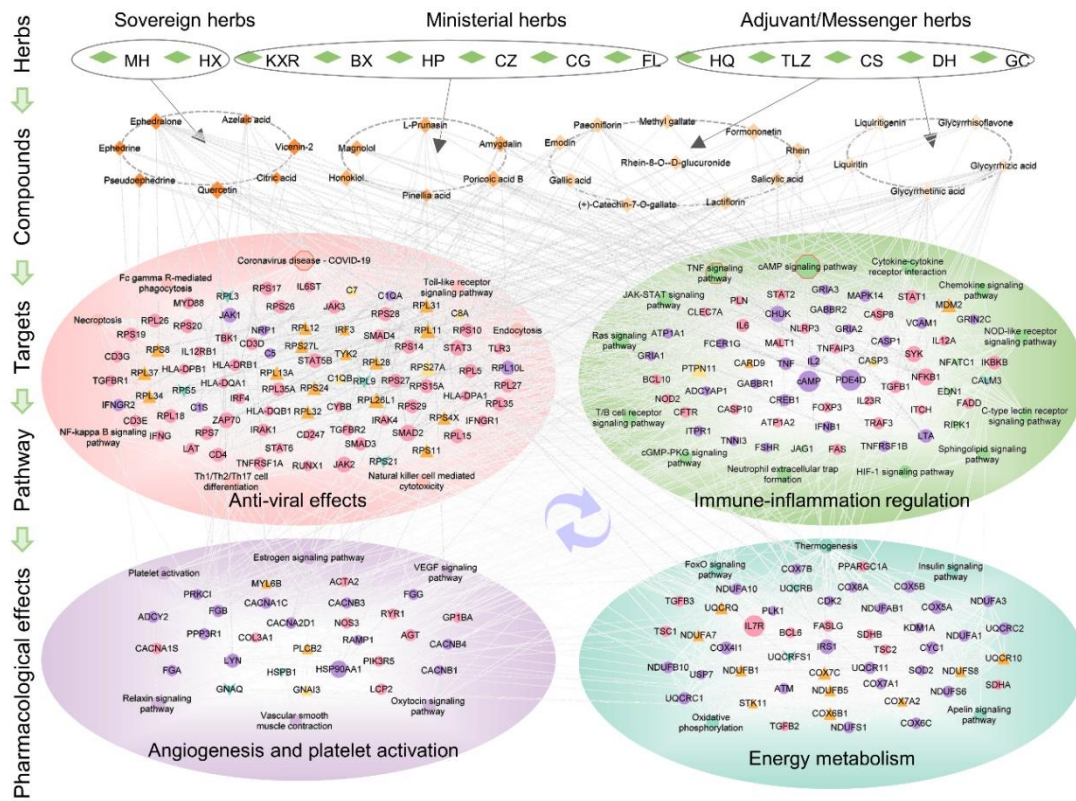

1

2 **Fig. S5** Multidimensional biomolecular interaction network among "disease-clinical  
 3 symptom-herbal formula" of Huashi Baidu decoction (Q-14). The green rhombuses  
 4 refer to fourteen Chinese herbs. The orange rhombuses refer to compounds in plasma  
 5 contained in Q-14 (the colors from dark to light are sovereign, ministerial, adjuvant,  
 6 and messenger herbs, respectively). The yellow and orange triangles refer to up-  
 7 regulated differentially expressed proteins and genes, respectively, while the dark and  
 8 light green inverted triangles represent down-regulated differentially expressed  
 9 proteins and genes, respectively. The dark pink nodes represent clinical symptom-  
 10 related genes. The purple nodes represent putative targets of compounds in plasma  
 11 contained in Q-14. The pink module indicates that Q-14 may exert antiviral effects; the  
 12 green module indicates that Q-14 may regulate the balance of the "immune-  
 13 inflammation" system; the purple module indicates that Q-14 may regulate  
 14 angiogenesis and platelet activation; and the bluish-green module indicates that Q-14  
 15 may regulate energy metabolism.

16

1 **References:**

- 2 1. Yang XH, *et al.* (2007) Mice transgenic for human angiotensin-converting  
3 enzyme 2 provide a model for SARS coronavirus infection. *Comparative*  
4 *medicine* 57(5):450-459.
- 5 2. Bai Y, *et al.* (2021) Structural basis for the inhibition of the SARS-CoV-2 main  
6 protease by the anti-HCV drug nardaprevir. *Signal transduction and targeted*  
7 *therapy* 6(1):51.

8
